# Supplementary material for: Overview and applications of map and model validation tools in the CCP-EM software suite
Source: Royal Society of Chemistry journal article supplement (doi:10.1039/d2fd00103a), 2022-01-01
Supplement: d2fd00103a1.pdf [file d2fd00103a1.pdf]

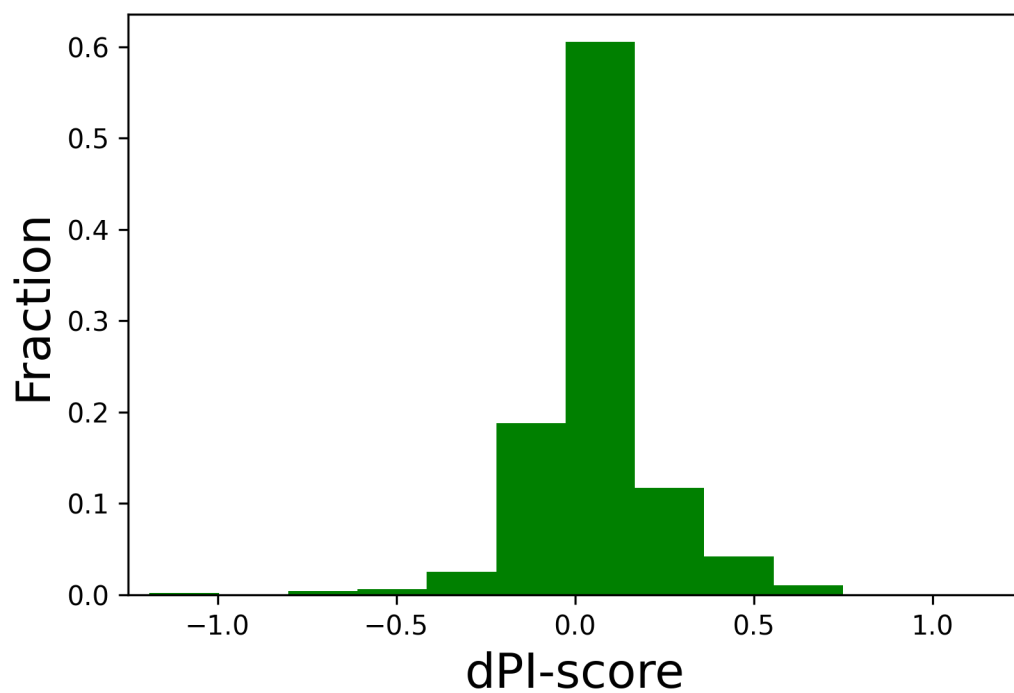

Suppl Figure 1. The distribution of change in PI-scores (dPI-score) of the subunit interfaces in the models re-refined using Servalcat (with respect to that of the deposited models).
